# Supplementary material
Source: PubMed Central journal article supplement (PMC4724651)
Supplement: mmc1.pdf [file mmc1.pdf]

## Supporting Material

### Insights into unfolded proteins from the intrinsic $\phi/\psi$ propensities of the AAXAA host-guest series

Clare-Louise Towse, Jiri Vymetal, Jiri Vondrasek and Valerie Daggett<sup>1</sup>

#### Supporting Material Figure Legends

**Figure S1. Ensemble averaged chemical shifts calculated for the full, 10% and 1% portions of the alanine and valine production trajectories in 8M urea demonstrating 1% of trajectory to be representative of the full ensembles.** Histograms show the change in distribution of  $^1\text{H}_\text{N}$  and  $^{15}\text{N}_\text{H}$  chemical shifts for the different ensembles used in the calculations. The mean chemical shifts for the  $^1\text{H}_\text{N}$  and  $^{15}\text{N}_\text{H}$  nuclei are tabulated with the standard deviations given in brackets.

**Figure S2. Convergence of conformational sampling of AAAAA in water.** (A) Comparison of the fractional population of the 64 states sampled over different sections of the trajectory for run #1 of AAAAA at 298 K. (B) Correlation coefficient for run #1 of AAAAA at 298 K. (C) Comparison of the fractional populations sampled between each pair of the three 298 K AAAAA simulations. (D) Comparison of the fractional populations of the 64 states over different sections of each of the three 498 K AAAAA simulations. (E) Comparisons of the fractional populations sampled between each pair of the three AAAAA 498 K simulations.

**Figure S3. Convergence of conformational sampling of AAGAA and AAWAA in 8M urea at 298 K.** Comparison of fractional population of the 64 states within individual simulations, (A) AAGAA and (C) AAWAA, and over different sections of the trajectories for run #1, (B) AAGAA and (D) AAWAA.

### Alanine

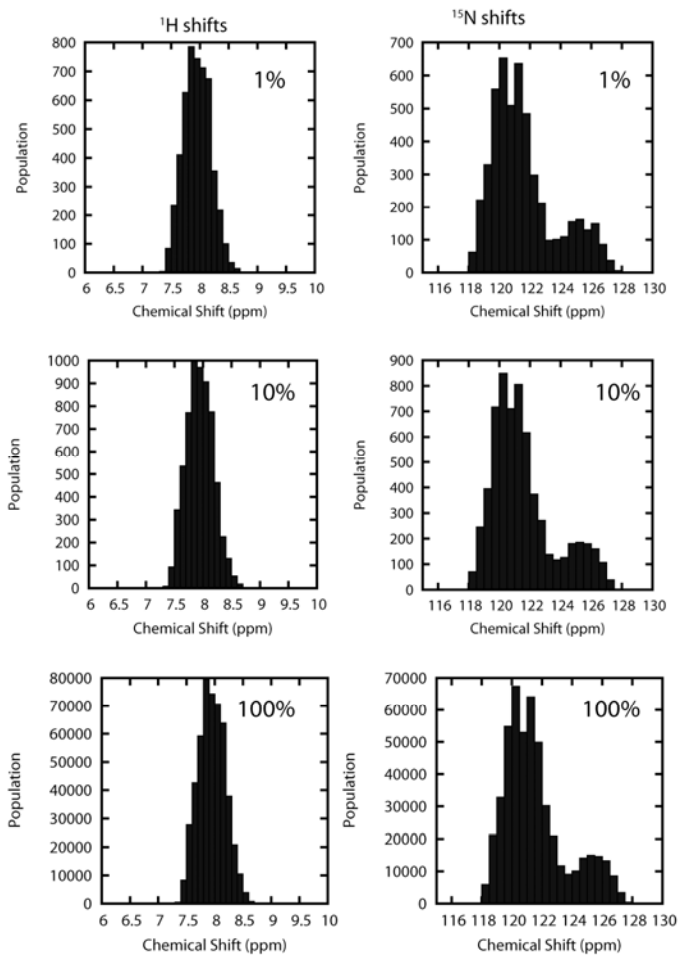

|     |                  | Mean chemical shift (ppm) |                 |
|-----|------------------|---------------------------|-----------------|
|     |                  | <sup>1</sup> H            | <sup>15</sup> N |
|     | % of MD ensemble |                           |                 |
| Ala | 1                | 7.95 (0.23)               | 121.60 (2.13)   |
| Ala | 10               | 7.95 (0.23)               | 121.56 (2.07)   |
| Ala | 100              | 7.95 (0.24)               | 121.57 (2.09)   |
| Val | 1                | 7.87 (0.30)               | 117.94 (3.04)   |
| Val | 10               | 7.87 (0.30)               | 117.94 (3.04)   |
| Val | 100              | 7.87 (0.30)               | 117.96 (3.06)   |

Figure S1

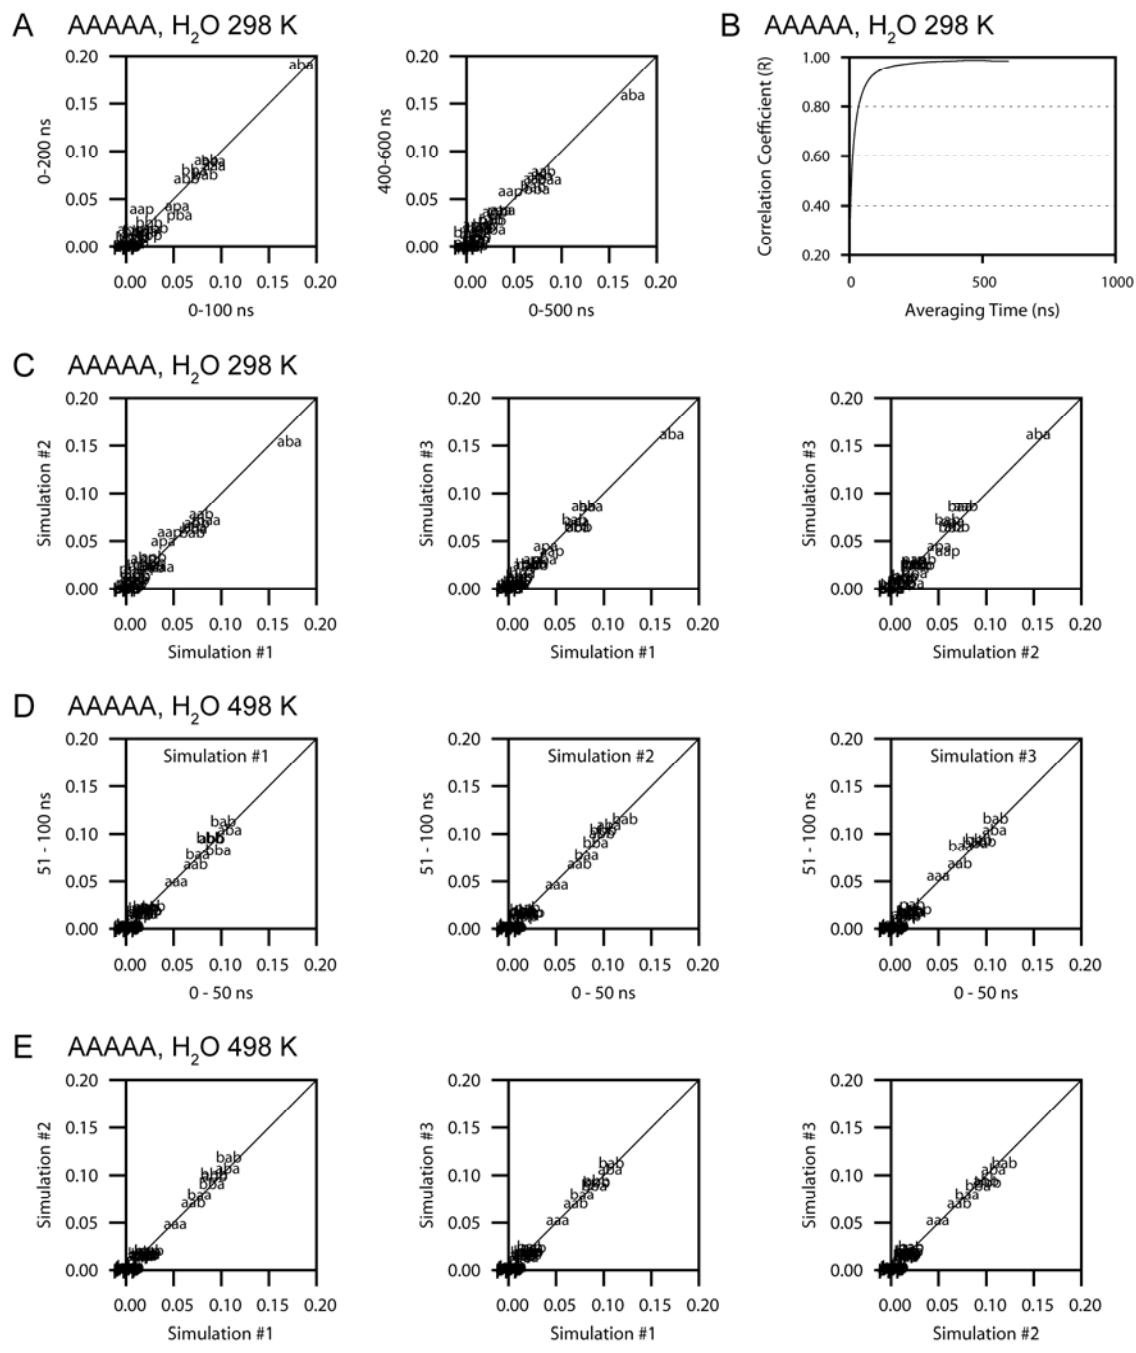

Figure S2

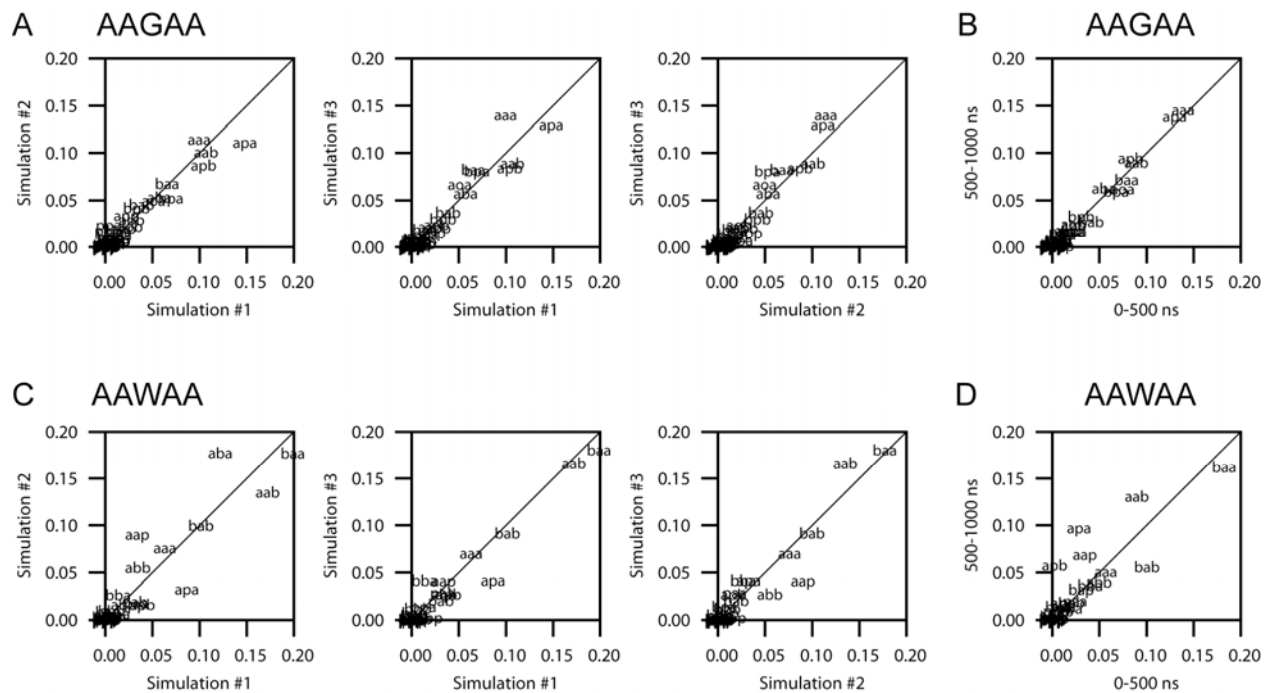

Figure S3

**Table S1. Chemical shifts determined for random samples of conformations taken from different portions of the AAXAA MD simulations. Values given are the ensemble averages for a 1% random sample of 500 ns of dynamics; standard deviations are given in parentheses.**

|     |   | First 500 ns Portion |                  |                |                        |                        |                        |                  |                 |                 | Latter 500 ns Portion |                  |                |                        |                        |                        |                  |                 |                 |
|-----|---|----------------------|------------------|----------------|------------------------|------------------------|------------------------|------------------|-----------------|-----------------|-----------------------|------------------|----------------|------------------------|------------------------|------------------------|------------------|-----------------|-----------------|
| Res | # | H <sub>N</sub>       | N <sub>H</sub>   | H $\alpha$     | H $\beta$ <sub>1</sub> | H $\beta$ <sub>2</sub> | H $\beta$ <sub>3</sub> | C'               | C $\alpha$      | C $\beta$       | H <sub>N</sub>        | N <sub>H</sub>   | H $\alpha$     | H $\beta$ <sub>1</sub> | H $\beta$ <sub>2</sub> | H $\beta$ <sub>3</sub> | C'               | C $\alpha$      | C $\beta$       |
| Ala | 1 | 7.92<br>(0.24)       | 121.59<br>(2.00) | 4.40<br>(0.10) | 1.39<br>(0.05)         | 1.72<br>(0.04)         | 1.64<br>(0.05)         | 177.17<br>(0.65) | 52.50<br>(0.82) | 19.64<br>(0.86) | 7.95<br>(0.24)        | 121.55<br>(2.09) | 4.41<br>(0.10) | 1.39<br>(0.05)         | 1.72<br>(0.04)         | 1.64<br>(0.05)         | 177.17<br>(0.65) | 52.64<br>(0.83) | 19.63<br>(0.85) |
| Ala | 2 | 7.95<br>(0.24)       | 121.86<br>(2.17) | 4.40<br>(0.10) | 1.39<br>(0.05)         | 1.72<br>(0.04)         | 1.64<br>(0.05)         | 177.22<br>(0.64) | 52.66<br>(0.87) | 19.63<br>(0.81) | 7.99<br>(0.24)        | 121.90<br>(2.23) | 4.39<br>(0.10) | 1.39<br>(0.05)         | 1.72<br>(0.04)         | 1.64<br>(0.05)         | 177.20<br>(0.67) | 52.75<br>(0.84) | 19.56<br>(0.87) |
| Ala | 3 | 7.97<br>(0.24)       | 121.92<br>(2.14) | 4.40<br>(0.10) | 1.39<br>(0.05)         | 1.72<br>(0.04)         | 1.64<br>(0.05)         | 177.19<br>(0.65) | 52.69<br>(0.84) | 19.56<br>(0.90) | 7.97<br>(0.24)        | 121.78<br>(2.11) | 4.39<br>(0.11) | 1.39<br>(0.05)         | 1.72<br>(0.04)         | 1.64<br>(0.05)         | 177.2<br>(0.63)  | 52.66<br>(0.83) | 19.48<br>(0.93) |
| Arg | 1 | 8.01<br>(0.25)       | 118.81<br>(2.20) | 4.38<br>(0.15) | -                      | 1.82<br>(0.07)         | 1.89<br>(0.06)         | 175.90<br>(0.52) | 56.49<br>(0.90) | 30.98<br>(1.13) | 8.02<br>(0.25)        | 118.96<br>(2.39) | 4.39<br>(0.14) | -                      | 1.81<br>(0.06)         | 1.89<br>(0.05)         | 175.93<br>(0.92) | 56.57<br>(0.92) | 31.15<br>(0.95) |
| Asp | 1 | 8.10<br>(0.19)       | 119.04<br>(2.55) | 4.66<br>(0.10) | -                      | 2.74<br>(0.04)         | 2.76<br>(0.04)         | 175.73<br>(0.69) | 54.85<br>(0.80) | 41.50<br>(0.72) | 8.12<br>(0.20)        | 119.06<br>(2.72) | 4.67<br>(0.10) | -                      | 2.74<br>(0.04)         | 2.76<br>(0.05)         | 175.73<br>(0.71) | 54.92<br>(0.79) | 41.60<br>(0.64) |
| Ash | 1 | 8.14<br>(0.23)       | 119.84<br>(2.65) | 4.65<br>(0.11) | -                      | 2.75<br>(0.04)         | 2.76<br>(0.05)         | 175.88<br>(0.64) | 55.22<br>(0.85) | 41.54<br>(0.64) | 8.09<br>(0.24)        | 119.56<br>(2.48) | 4.64<br>(0.11) | -                      | 2.75<br>(0.05)         | 2.77<br>(0.05)         | 175.85<br>(0.64) | 54.97<br>(0.91) | 41.40<br>(0.72) |
| Asn | 1 | 8.18<br>(0.24)       | 117.43<br>(2.55) | 4.74<br>(0.11) | -                      | 2.84<br>(0.05)         | 2.79<br>(0.07)         | 174.92<br>(0.60) | 54.12<br>(0.87) | 39.39<br>(0.63) | 8.10<br>(0.23)        | 116.72<br>(2.16) | 4.74<br>(0.11) | -                      | 2.84<br>(0.05)         | 2.79<br>(0.07)         | 174.80<br>(0.63) | 53.81<br>(0.88) | 39.29<br>(0.74) |
| Cys | 1 | 8.14<br>(0.29)       | 116.61<br>(2.36) | 4.66<br>(0.13) | -                      | 2.96<br>(0.09)         | 2.88<br>(0.07)         | 174.20<br>(0.49) | 58.88<br>(1.10) | 28.58<br>(0.88) | 8.09<br>(0.28)        | 116.04<br>(2.06) | 4.66<br>(0.13) | -                      | 2.96<br>(0.09)         | 2.87<br>(0.07)         | 174.16<br>(0.49) | 58.68<br>(1.06) | 28.59<br>(0.87) |
| Glu | 1 | 8.18<br>(0.28)       | 119.27<br>(2.27) | 4.36<br>(0.17) | -                      | 2.06<br>(0.06)         | 2.09<br>(0.07)         | 176.25<br>(0.53) | 56.83<br>(0.86) | 30.20<br>(1.17) | 8.14<br>(0.28)        | 119.53<br>(2.34) | 4.38<br>(0.15) | -                      | 2.05<br>(0.04)         | 2.07<br>(0.07)         | 176.29<br>(0.51) | 56.94<br>(0.93) | 30.54<br>(0.82) |
| Glh | 1 | 8.15<br>(0.28)       | 119.11<br>(2.28) | 4.41<br>(0.15) | -                      | 2.04<br>(0.05)         | 2.07<br>(0.07)         | 176.26<br>(0.56) | 56.94<br>(0.97) | 30.66<br>(0.88) | 8.17<br>(0.29)        | 119.36<br>(2.31) | 4.38<br>(0.17) | -                      | 2.05<br>(0.06)         | 2.08<br>(0.07)         | 176.22<br>(0.56) | 56.92<br>(0.89) | 30.31<br>(1.19) |
| Gln | 1 | 8.07<br>(0.28)       | 118.88<br>(2.18) | 4.36<br>(0.16) | -                      | 2.06<br>(0.06)         | 2.08<br>(0.07)         | 175.65<br>(0.54) | 56.28<br>(0.85) | 29.49<br>(1.28) | 8.08<br>(0.27)        | 118.79<br>(2.37) | 4.39<br>(0.15) | -                      | 2.05<br>(0.05)         | 2.08<br>(0.07)         | 175.74<br>(0.53) | 56.44<br>(0.92) | 29.82<br>(1.02) |
| Gly | 1 | 8.12<br>(0.25)       | 107.40<br>(1.86) | 4.00<br>(0.10) | -                      | -                      | -                      | 174.23<br>(0.54) | 45.66<br>(0.60) | -               | 8.12<br>(0.25)        | 107.39<br>(1.78) | 4.00<br>(0.09) | -                      | -                      | -                      | 174.20<br>(0.57) | 45.63<br>(0.59) | -               |
| Gly | 2 | 8.12<br>(0.25)       | 107.38<br>(1.81) | 4.00<br>(0.09) | -                      | -                      | -                      | 174.20<br>(0.55) | 45.61<br>(0.58) | -               | 8.13<br>(0.25)        | 107.49<br>(1.87) | 4.00<br>(0.09) | -                      | -                      | -                      | 174.17<br>(0.57) | 45.62<br>(0.58) | -               |
| Gly | 3 | 8.14<br>(0.25)       | 107.47<br>(1.87) | 3.99<br>(0.09) | -                      | -                      | -                      | 174.19<br>(0.57) | 45.64<br>(0.61) | -               | 8.13<br>(0.25)        | 107.41<br>(1.84) | 4.00<br>(0.09) | -                      | -                      | -                      | 174.21<br>(0.55) | 45.62<br>(0.58) | -               |
| Hid | 1 | 8.13<br>(0.27)       | 117.59<br>(2.63) | 4.73<br>(0.13) | -                      | 3.22<br>(0.06)         | 3.22<br>(0.05)         | 174.31<br>(0.57) | 56.08<br>(0.82) | 30.37<br>(0.79) | 8.19<br>(0.28)        | 117.85<br>(2.79) | 4.73<br>(0.14) | -                      | 3.24<br>(0.06)         | 3.22<br>(0.05)         | 174.29<br>(0.55) | 56.22<br>(0.80) | 30.35<br>(0.88) |
| Hie | 1 | 8.10<br>(0.27)       | 117.31<br>(2.37) | 4.68<br>(0.17) | -                      | 3.23<br>(0.07)         | 3.23<br>(0.06)         | 174.36<br>(0.58) | 56.10<br>(0.83) | 30.01<br>(1.17) | 8.08<br>(0.28)        | 116.59<br>(2.37) | 4.71<br>(0.14) | -                      | 3.22<br>(0.07)         | 3.22<br>(0.05)         | 174.31<br>(0.57) | 55.91<br>(0.83) | 30.25<br>(0.89) |

|                                              |   | First 500 ns Portion |                  |                |                        |                        |                        |                  |                 |                 | Latter 500 ns Portion |                  |                |                        |                        |                        |                  |                 |                 |             |
|----------------------------------------------|---|----------------------|------------------|----------------|------------------------|------------------------|------------------------|------------------|-----------------|-----------------|-----------------------|------------------|----------------|------------------------|------------------------|------------------------|------------------|-----------------|-----------------|-------------|
| Res                                          | # | H <sub>N</sub>       | N <sub>H</sub>   | H $\alpha$     | H $\beta$ <sub>1</sub> | H $\beta$ <sub>2</sub> | H $\beta$ <sub>3</sub> | C'               | C $\alpha$      | C $\beta$       | H <sub>N</sub>        | N <sub>H</sub>   | H $\alpha$     | H $\beta$ <sub>1</sub> | H $\beta$ <sub>2</sub> | H $\beta$ <sub>3</sub> | C'               | C $\alpha$      | C $\beta$       |             |
| Hip                                          | 1 | 8.15<br>(0.26)       | 117.65<br>(2.34) | 4.66<br>(0.20) | -                      | 3.24<br>(0.07)         | 3.22<br>(0.06)         | 174.19<br>(0.55) | 56.10<br>(0.68) | 29.68<br>(1.62) | 8.18<br>(0.24)        | 117.44<br>(2.58) | 4.70<br>(0.18) | -                      | 3.24<br>(0.06)         | 3.22<br>(0.05)         | 174.17<br>(0.54) | 56.10<br>(0.62) | 30.03<br>(1.46) |             |
| Ile                                          | 1 | 7.79<br>(0.28)       | 117.12<br>(3.15) | 4.28<br>(0.13) | 1.87<br>(0.06)         | -                      | -                      | 175.88<br>(0.53) | 60.89<br>(1.02) | 39.19<br>(0.74) | 7.75<br>(0.27)        | 116.80<br>(2.87) | 4.28<br>(0.13) | 1.87<br>(0.05)         | -                      | -                      | 175.88<br>(0.51) | 60.70<br>(0.95) | 39.15<br>(0.84) |             |
| Leu                                          | 1 | 7.92<br>(0.28)       | 120.57<br>(2.50) | 4.41<br>(0.14) | -                      | 1.68<br>(0.05)         | 1.56<br>(0.07)         | 177.07<br>(0.47) | 55.61<br>(0.99) | 42.75<br>(0.80) | 7.92<br>(0.27)        | 120.42<br>(2.50) | 4.40<br>(0.14) | -                      | 1.69<br>(0.05)         | 1.57<br>(0.07)         | 177.06<br>(0.50) | 55.63<br>(0.98) | 42.69<br>(0.84) |             |
| Lys                                          | 1 | 8.04<br>(0.26)       | 118.83<br>(2.19) | 4.38<br>(0.14) | -                      | 1.82<br>(0.06)         | 1.89<br>(0.05)         | 176.25<br>(0.53) | 56.68<br>(0.90) | 33.35<br>(0.95) | 8.03<br>(0.27)        | 119.10<br>(2.32) | 4.37<br>(0.14) | -                      | 1.87<br>(0.06)         | 1.88<br>(0.05)         | 176.26<br>(0.52) | 56.73<br>(0.90) | 33.34<br>(0.94) |             |
| Met                                          | 1 | 8.03<br>(0.25)       | 118.24<br>(2.33) | 4.52<br>(0.14) | -                      | 2.04<br>(0.05)         | 2.08<br>(0.06)         | 175.89<br>(0.51) | 55.96<br>(0.95) | 33.14<br>(1.03) | 8.04<br>(0.26)        | 118.87<br>(2.54) | 4.54<br>(0.13) | -                      | 2.03<br>(0.05)         | 2.07<br>(0.06)         | 175.90<br>(0.52) | 56.06<br>(0.99) | 33.37<br>(0.83) |             |
| Phe                                          | 1 | 8.05<br>(0.38)       | 118.58<br>(2.75) | 4.65<br>(0.18) | -                      | 3.08<br>(0.09)         | 2.99<br>(0.11)         | 175.38<br>(0.60) | 58.55<br>(1.02) | 40.15<br>(0.90) | 8.04<br>(0.39)        | 118.62<br>(2.73) | 4.66<br>(0.17) | -                      | 3.07<br>(0.08)         | 2.99<br>(0.11)         | 175.37<br>(0.62) | 58.40<br>(1.06) | 40.17<br>(0.83) |             |
| Pro                                          | 1 | -                    | -                | 4.47<br>(0.05) | -                      | 2.16<br>(0.06)         | 2.15<br>(0.06)         | 176.85<br>(0.44) | 63.01<br>(0.45) | 32.23<br>(0.40) | -                     | -                | 4.46<br>(0.06) | -                      | 2.16<br>(0.06)         | 2.15<br>(0.07)         | 176.87<br>(0.41) | 63.07<br>(0.48) | 32.22<br>(0.40) |             |
| Ser                                          | 1 | 8.00<br>(0.25)       | 114.91<br>(2.05) | 4.49<br>(0.12) | -                      | 3.95<br>(0.07)         | 4.04<br>(0.08)         | 174.32<br>(0.43) | 58.49<br>(0.84) | 63.90<br>(0.68) | 8.05<br>(0.25)        | 115.05<br>(2.10) | 4.48<br>(0.13) | -                      | 3.95<br>(0.07)         | 4.03<br>(0.08)         | 174.38<br>(0.44) | 58.83<br>(0.95) | 63.91<br>(0.70) |             |
| Thr                                          | 1 | 7.98<br>(0.25)       | 113.67<br>(2.73) | 4.35<br>(0.13) | 4.27<br>(0.14)         | -                      | -                      | 174.53<br>(0.43) | 62.56<br>(1.06) | 69.95<br>(0.60) | 8.03<br>(0.25)        | 113.98<br>(2.77) | 4.35<br>(0.14) | 4.24<br>(0.13)         | -                      | -                      | 174.49<br>(0.43) | 62.76<br>(1.00) | 69.98<br>(0.56) |             |
| Trp                                          | 1 | 7.97<br>(0.41)       | 119.77<br>(2.73) | 4.72<br>(0.18) | -                      | 3.23<br>(0.07)         | 3.21<br>(0.07)         | 175.65<br>(0.64) | 57.95<br>(1.00) | 30.15<br>(1.21) | 7.98<br>(0.39)        | 119.88<br>(2.80) | 4.71<br>(0.18) | -                      | 3.24<br>(0.07)         | 3.22<br>(0.07)         | 175.70<br>(0.62) | 58.15<br>(0.96) | 30.14<br>(1.34) |             |
| Trp                                          | 2 | 8.06<br>(0.39)       | 119.96<br>(2.85) | 4.72<br>(0.17) | -                      | 3.22<br>(0.06)         | 3.21<br>(0.07)         | 175.69<br>(0.67) | 58.16<br>(1.00) | 30.40<br>(0.90) | 7.99<br>(0.40)        | 119.75<br>(2.81) | 4.73<br>(0.17) | -                      | 3.23<br>(0.06)         | 3.21<br>(0.07)         | 175.70<br>(0.63) | 58.07<br>(1.04) | 30.31<br>(1.10) |             |
| Trp                                          | 3 | 7.98<br>(0.41)       | 119.94<br>(2.75) | 4.69<br>(0.19) | -                      | 3.24<br>(0.07)         | 3.22<br>(0.08)         | 175.68<br>(0.62) | 58.09<br>(0.98) | 29.94<br>(1.43) | 7.98<br>(0.43)        | 119.91<br>(2.75) | 4.71<br>(0.18) | -                      | 3.23<br>(0.07)         | 3.22<br>(0.07)         | 175.74<br>(0.61) | 58.07<br>(1.07) | 30.20<br>(1.18) |             |
| Tyr                                          | 1 | 7.97<br>(0.35)       | 117.88<br>(2.54) | 4.62<br>(0.16) | -                      | 2.99<br>(0.08)         | 2.82<br>(0.09)         | 175.43<br>(0.59) | 58.59<br>(0.97) | 39.41<br>(0.80) | 8.04<br>(0.36)        | 119.06<br>(2.98) | 4.63<br>(0.16) | -                      | 3.00<br>(0.07)         | 2.82<br>(0.09)         | 175.51<br>(0.57) | 58.78<br>(0.98) | 39.50<br>(0.68) |             |
| Val                                          | 1 | 7.83<br>(0.28)       | 116.99<br>(2.86) | 4.19<br>(0.13) | 2.08<br>(0.08)         | -                      | -                      | 175.80<br>(0.49) | 62.25<br>(1.22) | 33.13<br>(0.70) | 7.88<br>(0.30)        | 117.97<br>(3.01) | 4.19<br>(0.14) | 2.07<br>(0.07)         | -                      | -                      | 175.80<br>(0.49) | 62.37<br>(1.19) | 33.12<br>(0.74) |             |
| <b>Pearson Correlation between Datasets:</b> |   |                      |                  |                |                        |                        |                        |                  |                 |                 | <b>0.93</b>           | <b>0.99</b>      | <b>1.00</b>    | <b>1.00</b>            | <b>1.00</b>            | <b>1.00</b>            | <b>1.00</b>      | <b>1.00</b>     | <b>1.00</b>     | <b>1.00</b> |

**Table S2. Correlation coefficients (R) between initial and latter portions of the trajectories for the 64 conformational states populated by the three central residues.**

| <b>X</b>       | <b>Water*<br/>298 K</b> | <b>8M Urea†<br/>298 K</b> | <b>Water§<br/>498 K</b> |
|----------------|-------------------------|---------------------------|-------------------------|
| Ala-1          | 0.99                    | 0.98                      | 1.00                    |
| Ala-2          | 0.98                    | 0.95                      | 1.00                    |
| Ala-3          | 0.99                    | 0.98                      | 0.99                    |
| Arg            | 0.96                    | 0.95                      | 0.99                    |
| Asp            | 0.97                    | 0.98                      | 0.99                    |
| Ash            | 0.95                    | 0.90                      | 1.00                    |
| Asn            | 0.93                    | 0.88                      | 0.99                    |
| Cyh            | 0.98                    | 0.94                      | 0.99                    |
| Gln            | 0.97                    | 0.94                      | 1.00                    |
| Glu            | 0.98                    | 0.91                      | 0.99                    |
| Glh            | 0.96                    | 0.95                      | 0.99                    |
| Gly-1          | 0.98                    | 0.97                      | 0.99                    |
| Gly-2          | -                       | 0.98                      | -                       |
| Gly-3          | -                       | 0.97                      | -                       |
| Hid            | 0.96                    | 0.92                      | 0.99                    |
| Hie            | 0.94                    | 0.82                      | 1.00                    |
| Hip            | 0.72                    | 0.92                      | 1.00                    |
| Ile            | 0.95                    | 0.97                      | 1.00                    |
| Leu            | 0.90                    | 0.97                      | 0.99                    |
| Lys            | 0.95                    | 0.94                      | 0.99                    |
| Met            | 0.92                    | 0.92                      | 0.99                    |
| Phe            | 0.95                    | 0.95                      | 1.00                    |
| Pro            | 0.99                    | 0.97                      | 1.00                    |
| Ser            | 0.96                    | 0.87                      | 1.00                    |
| Thr            | 0.95                    | 0.87                      | 1.00                    |
| Trp-1          | 0.97                    | 0.89                      | 0.99                    |
| Trp-2          | -                       | 0.94                      | -                       |
| Trp-3          | -                       | 0.93                      | -                       |
| Tyr            | 0.91                    | 0.84                      | 0.99                    |
| Val            | 0.88                    | 0.92                      | 0.99                    |
| <b>Average</b> | <b>0.95</b>             | <b>0.93</b>               | <b>0.99</b>             |

The latter portions were that part of the trajectory (production dynamics) used for analysis. The start position and length of the production dynamics for each set of simulations was defined by the convergence behavior as exhibited in Figures 1, S2 – S3. \*last 300 ns, †last 500 ns, §last 50 ns

**Table S3. Conformational propensities of the guest residues (X) in water at 298 K.**

| X     | Population Frequency (%) |           |                |       |                                   |                 |            |         |               |           |          |       |                          |                                  |                      |
|-------|--------------------------|-----------|----------------|-------|-----------------------------------|-----------------|------------|---------|---------------|-----------|----------|-------|--------------------------|----------------------------------|----------------------|
|       | By quadrant              |           |                |       | By specific conformational region |                 |            |         |               |           |          |       |                          | Total $\alpha$ -basin            | Total $\beta$ -basin |
|       | $Q_\alpha$               | $Q_\beta$ | $Q_{\alpha L}$ | $Q_o$ | $\alpha_R$                        | Near $\alpha_R$ | $\alpha_L$ | $\beta$ | Non-P $\beta$ | $P_{III}$ | $P_{IR}$ | Other | ( $\alpha + n\alpha_R$ ) | ( $nP\beta + P_{III} + P_{IR}$ ) |                      |
| Ala-1 | 46.2                     | 39.8      | 13.6           | 0.4   | 20.3                              | 18.1            | 11.6       | 28.9    | 12.8          | 13.7      | 6.6      | 16.9  | 38.4                     | 33.1                             |                      |
| Ala-2 | 41.7                     | 41.8      | 16.2           | 0.4   | 17.7                              | 16.1            | 14.0       | 32.2    | 14.4          | 15.4      | 6.1      | 16.2  | 33.8                     | 35.9                             |                      |
| Ala-3 | 45.6                     | 41.7      | 12.4           | 0.3   | 20.3                              | 17.3            | 10.4       | 31.3    | 13.7          | 15.2      | 6.5      | 16.6  | 37.6                     | 35.4                             |                      |
| Arg   | 55.6                     | 33.8      | 10.3           | 0.2   | 26.6                              | 21.7            | 9.2        | 28.0    | 12.0          | 14.5      | 3.4      | 12.6  | 48.3                     | 29.9                             |                      |
| Asn   | 59.2                     | 33.4      | 7.3            | 0.1   | 34.0                              | 21.6            | 6.3        | 27.7    | 16.0          | 8.7       | 4.9      | 8.5   | 55.6                     | 29.6                             |                      |
| Asp   | 67.8                     | 21.8      | 10.3           | 0.1   | 29.2                              | 36.2            | 9.7        | 6.9     | 4.6           | 0.4       | 6.5      | 13.5  | 65.4                     | 11.5                             |                      |
| Ash   | 65.4                     | 24.5      | 10.0           | 0.1   | 36.5                              | 25.4            | 9.1        | 20.0    | 12.3          | 5.4       | 3.9      | 7.5   | 61.9                     | 21.6                             |                      |
| Cys   | 48.2                     | 41.4      | 10.0           | 0.4   | 20.8                              | 20.3            | 8.8        | 33.2    | 14.3          | 17.3      | 4.3      | 14.3  | 41.1                     | 35.9                             |                      |
| Gln   | 48.2                     | 32.2      | 19.4           | 0.2   | 22.9                              | 18.8            | 17.7       | 26.4    | 11.0          | 14.1      | 3.2      | 12.2  | 41.7                     | 28.3                             |                      |
| Glu   | 50.6                     | 36.8      | 12.4           | 0.2   | 25.9                              | 18.1            | 11.4       | 28.9    | 12.7          | 14.5      | 4.2      | 13.2  | 44.0                     | 31.4                             |                      |
| Glh   | 51.4                     | 33.9      | 14.6           | 0.1   | 22.7                              | 22.2            | 13.3       | 26.4    | 11.7          | 13.0      | 4.2      | 12.9  | 44.9                     | 28.9                             |                      |
| Gly   | 41.2                     | 9.2       | 39.4           | 10.2  | 14.2                              | 3.2             | 11.5       | 8.0     | 3.7           | 3.9       | 1.2      | 62.4  | 17.4                     | 8.8                              |                      |
| Hid   | 62.3                     | 29.6      | 8.0            | 0.1   | 27.3                              | 28.3            | 7.2        | 23.1    | 11.8          | 9.5       | 4.0      | 11.9  | 55.6                     | 25.3                             |                      |
| Hie   | 54.6                     | 35.1      | 10.2           | 0.1   | 27.9                              | 20.0            | 8.9        | 29.5    | 13.1          | 14.9      | 3.0      | 12.2  | 47.9                     | 31.0                             |                      |
| Hip   | 42.3                     | 27.1      | 30.1           | 0.5   | 8.8                               | 28.2            | 24.7       | 16.6    | 10.3          | 3.2       | 8.2      | 16.6  | 37.0                     | 21.7                             |                      |
| Ile   | 39.6                     | 55.7      | 4.7            | <0.1  | 15.5                              | 17.0            | 4.4        | 46.1    | 14.2          | 31.4      | 1.8      | 15.7  | 32.5                     | 47.4                             |                      |
| Leu   | 61.1                     | 21.0      | 17.6           | 0.3   | 33.7                              | 21.2            | 15.8       | 18.0    | 6.9           | 10.4      | 1.3      | 10.7  | 54.9                     | 18.6                             |                      |
| Lys   | 55.2                     | 32.1      | 12.5           | 0.2   | 27.2                              | 21.1            | 11.3       | 26.3    | 10.9          | 14.0      | 3.3      | 12.2  | 48.3                     | 28.2                             |                      |
| Met   | 51.0                     | 28.7      | 20.0           | 0.3   | 25.3                              | 19.7            | 18.0       | 23.0    | 10.0          | 11.7      | 2.8      | 12.4  | 45.0                     | 24.5                             |                      |
| Phe   | 56.8                     | 25.8      | 17.2           | 0.2   | 26.4                              | 25.1            | 15.5       | 20.4    | 10.5          | 8.3       | 3.2      | 10.9  | 51.5                     | 22.0                             |                      |
| Pro   | 5.1                      | 94.9      | -              | -     | 3.1                               | -               | -          | 89.4    | 11.2          | 78.2      | -        | 7.6   | 3.1                      | 89.4                             |                      |
| Ser   | 45.0                     | 49.9      | 5.0            | 0.1   | 24.0                              | 10.2            | 4.5        | 44.6    | 12.7          | 31.3      | 1.7      | 15.5  | 34.2                     | 45.7                             |                      |
| Thr   | 55.0                     | 44.3      | 0.7            | <0.1  | 35.7                              | 14.2            | 0.7        | 38.1    | 12.1          | 25.5      | 1.2      | 10.5  | 49.9                     | 38.8                             |                      |
| Trp   | 62.3                     | 26.0      | 11.6           | 0.2   | 28.6                              | 28.0            | 10.5       | 20.5    | 10.8          | 8.1       | 3.2      | 10.8  | 56.6                     | 22.1                             |                      |
| Tyr   | 54.0                     | 25.7      | 20.0           | 0.3   | 24.0                              | 24.4            | 18.0       | 20.1    | 10.9          | 7.5       | 3.7      | 11.6  | 48.4                     | 22.1                             |                      |
| Val   | 42.3                     | 56.5      | 1.2            | <0.1  | 16.8                              | 19.0            | 1.1        | 49.4    | 17.0          | 31.4      | 2.3      | 12.3  | 35.8                     | 50.7                             |                      |



**Table S4. Conformational propensities of the ‘guest’ residues (X) in 8M urea at 298 K.**

| X     | Population Frequency (%) |           |                |       |                                   |                 |            |         |               |           |          |       |                          |                                  |
|-------|--------------------------|-----------|----------------|-------|-----------------------------------|-----------------|------------|---------|---------------|-----------|----------|-------|--------------------------|----------------------------------|
|       | By quadrant              |           |                |       | By specific conformational region |                 |            |         |               |           |          |       | Total $\alpha$ -basin    | Total $\beta$ -basin             |
|       | $Q_\alpha$               | $Q_\beta$ | $Q_{\alpha L}$ | $Q_o$ | $\alpha_R$                        | Near $\alpha_R$ | $\alpha_L$ | $\beta$ | Non-P $\beta$ | $P_{III}$ | $P_{IR}$ | Other | ( $\alpha + n\alpha_R$ ) | ( $nP\beta + P_{III} + P_{IR}$ ) |
| Ala-1 | 45.1                     | 48.1      | 6.7            | 0.2   | 13.1                              | 23.6            | 5.3        | 39.7    | 18.2          | 17.6      | 8.1      | 14.0  | 36.7                     | 43.9                             |
| Ala-2 | 50.4                     | 40.4      | 8.8            | 0.3   | 16.2                              | 26.3            | 7.0        | 32.7    | 13.8          | 16.3      | 5.9      | 14.6  | 42.5                     | 36.0                             |
| Ala-3 | 40.6                     | 48.5      | 10.6           | 0.3   | 13.6                              | 19.3            | 8.9        | 39.0    | 16.5          | 19.0      | 8.3      | 14.4  | 32.9                     | 43.8                             |
| Arg   | 55.8                     | 37.9      | 6.2            | 0.1   | 19.2                              | 29.7            | 5.7        | 33.2    | 14.6          | 16.8      | 3.6      | 10.4  | 48.9                     | 35.0                             |
| Asn   | 50.9                     | 44.7      | 4.3            | <0.1  | 20.1                              | 27.2            | 3.7        | 37.8    | 20.9          | 12.5      | 7.2      | 8.3   | 47.3                     | 40.6                             |
| Asp   | 81.7                     | 15.8      | 2.4            | <0.1  | 23.7                              | 55.5            | 2.2        | 5.4     | 3.4           | 0.3       | 4.7      | 10.3  | 79.2                     | 8.4                              |
| Ash   | 57.7                     | 34.5      | 7.7            | 0.1   | 25.0                              | 29.7            | 6.8        | 28.0    | 16.5          | 5.8       | 8.9      | 7.2   | 54.7                     | 31.2                             |
| Cys   | 44.2                     | 50.7      | 5.0            | 0.1   | 13.0                              | 22.7            | 4.2        | 44.4    | 19.7          | 21.9      | 6.1      | 12.4  | 35.7                     | 47.7                             |
| Gln   | 58.6                     | 32.8      | 8.5            | 0.1   | 21.9                              | 29.5            | 7.5        | 28.8    | 12.2          | 15.0      | 3.3      | 10.7  | 51.4                     | 30.5                             |
| Glu   | 53.6                     | 42.9      | 3.4            | 0.1   | 22.0                              | 23.7            | 3.0        | 38.6    | 15.6          | 21.3      | 3.4      | 11.1  | 45.7                     | 40.3                             |
| Glh   | 48.1                     | 36.3      | 15.4           | 0.2   | 15.9                              | 25.2            | 13.5       | 31.2    | 13.5          | 15.6      | 4.5      | 11.9  | 41.1                     | 33.6                             |
| Gly-1 | 35.2                     | 12.1      | 39.1           | 13.5  | 8.5                               | 3.7             | 9.8        | 11.3    | 5.4           | 5.0       | 1.9      | 65.7  | 12.2                     | 12.3                             |
| Gly-2 | 37.9                     | 12.3      | 38.4           | 11.4  | 9.5                               | 4.7             | 8.9        | 11.5    | 5.3           | 5.5       | 1.6      | 64.6  | 14.2                     | 12.4                             |
| Gly-3 | 39.5                     | 11.0      | 37.0           | 12.5  | 9.3                               | 4.6             | 8.7        | 10.4    | 5.1           | 4.5       | 1.9      | 66.0  | 13.9                     | 11.5                             |
| Hid   | 75.9                     | 19.8      | 4.1            | 0.2   | 25.1                              | 44.2            | 3.5        | 15.4    | 8.1           | 6.1       | 2.6      | 10.4  | 69.3                     | 16.8                             |
| Hie   | 53.8                     | 41.9      | 4.2            | <0.1  | 16.9                              | 29.1            | 3.5        | 37.4    | 17.4          | 17.6      | 4.3      | 11.1  | 46.0                     | 39.3                             |
| Hip   | 63.3                     | 14.7      | 21.5           | 0.5   | 10.0                              | 47.7            | 16.6       | 8.6     | 4.7           | 2.1       | 4.4      | 14.5  | 57.7                     | 11.2                             |
| Ile   | 29.5                     | 67.7      | 2.9            | <0.1  | 6.8                               | 15.6            | 2.6        | 64.2    | 23.5          | 39.8      | 1.7      | 10.0  | 22.4                     | 65.0                             |
| Leu   | 55.1                     | 36.8      | 7.8            | 0.3   | 22.9                              | 25.7            | 6.9        | 33.3    | 13.5          | 18.2      | 3.1      | 9.8   | 48.6                     | 34.8                             |
| Lys   | 53.4                     | 39.9      | 6.7            | <0.1  | 19.2                              | 27.2            | 6.0        | 35.3    | 14.5          | 18.7      | 4.3      | 10.1  | 46.4                     | 37.5                             |
| Met   | 60.8                     | 34.7      | 4.5            | 0.1   | 21.9                              | 31.5            | 4.0        | 30.4    | 12.6          | 16.1      | 3.5      | 10.4  | 53.4                     | 32.2                             |
| Phe   | 60.1                     | 35.9      | 3.9            | <0.1  | 20.2                              | 34.5            | 3.4        | 30.2    | 16.3          | 10.4      | 6.2      | 9.0   | 54.7                     | 32.9                             |
| Pro   | 7.1                      | 92.9      | -              | -     | 5.0                               | -               | -          | 86.9    | 10.3          | 76.6      | -        | 8.1   | 5.0                      | 86.9                             |
| Ser   | 48.8                     | 45.2      | 5.7            | 0.3   | 23.5                              | 15.4            | 4.9        | 41.8    | 10.3          | 31.2      | 0.9      | 13.7  | 38.9                     | 42.4                             |
| Thr   | 71.3                     | 28.6      | 0.1            | <0.1  | 42.1                              | 24.2            | 0.1        | 24.9    | 7.1           | 17.6      | 0.6      | 8.4   | 66.3                     | 25.3                             |
| Trp-1 | 64.2                     | 20.5      | 15.0           | 0.3   | 19.4                              | 38.9            | 13.1       | 16.7    | 9.3           | 5.9       | 2.9      | 10.5  | 58.3                     | 18.1                             |
| Trp-2 | 63.2                     | 30.0      | 6.6            | 0.2   | 22.0                              | 35.0            | 5.6        | 25.3    | 14.3          | 8.6       | 4.5      | 10.0  | 57.0                     | 27.4                             |
| Trp-3 | 61.0                     | 29.8      | 9.1            | 0.2   | 22.0                              | 33.3            | 7.9        | 25.3    | 13.3          | 9.4       | 4.6      | 9.4   | 55.3                     | 27.3                             |
| Tyr   | 76.5                     | 22.6      | 0.9            | <0.1  | 25.8                              | 44.2            | 0.8        | 18.0    | 10.4          | 5.7       | 3.9      | 9.2   | 70.0                     | 20.0                             |
| Val   | 51.5                     | 46.6      | 1.8            | <0.1  | 16.1                              | 29.3            | 1.7        | 42.4    | 16.8          | 24.7      | 1.8      | 9.6   | 45.4                     | 43.3                             |

**Table S5. Conformational propensities of the ‘guest’ residues (X) in water at 498 K.**

| X     | Population Frequency (%) |           |                |           |                                   |                    |            |         |                  |           |          |       | Total $\alpha$ -basin<br>( $\alpha + n\alpha_R$ ) | Total $\beta$ -basin<br>( $nP\beta + P_{IIL} + P_{IR}$ ) |
|-------|--------------------------|-----------|----------------|-----------|-----------------------------------|--------------------|------------|---------|------------------|-----------|----------|-------|---------------------------------------------------|----------------------------------------------------------|
|       | By quadrant              |           |                |           | By specific conformational region |                    |            |         |                  |           |          |       |                                                   |                                                          |
|       | $Q_\alpha$               | $Q_\beta$ | $Q_{\alpha L}$ | $Q_\circ$ | $\alpha_R$                        | Near<br>$\alpha_R$ | $\alpha_L$ | $\beta$ | Non-P<br>$\beta$ | $P_{IIL}$ | $P_{IR}$ | Other |                                                   |                                                          |
| Ala-1 | 39.8                     | 48.8      | 9.5            | 1.9       | 15.4                              | 12.9               | 5.9        | 33.6    | 20.6             | 10.1      | 7.4      | 27.8  | 28.3                                              | 38.1                                                     |
| Ala-2 | 40.1                     | 49.6      | 8.6            | 1.8       | 14.9                              | 13.5               | 5.1        | 33.5    | 20.6             | 9.9       | 7.5      | 28.5  | 28.4                                              | 38.0                                                     |
| Ala-3 | 39.4                     | 50.1      | 8.3            | 2.2       | 15.0                              | 13.0               | 5.0        | 34.7    | 21.0             | 10.8      | 7.2      | 28.2  | 28.0                                              | 39.0                                                     |
| Arg   | 44.2                     | 48.9      | 6.0            | 0.9       | 19.4                              | 15.7               | 4.6        | 34.4    | 19.9             | 12.1      | 5.5      | 22.7  | 35.1                                              | 37.5                                                     |
| Asn   | 45.0                     | 47.0      | 7.3            | 0.7       | 21.5                              | 15.9               | 5.0        | 36.6    | 22.5             | 11.1      | 5.5      | 18.4  | 37.4                                              | 39.1                                                     |
| Asp   | 48.5                     | 37.1      | 13.3           | 1.1       | 20.4                              | 23.0               | 10.3       | 15.1    | 9.8              | 2.4       | 8.2      | 25.9  | 43.4                                              | 20.4                                                     |
| Ash   | 49.0                     | 40.9      | 9.0            | 1.1       | 23.0                              | 19.5               | 6.5        | 29.2    | 19.3             | 6.1       | 7.2      | 18.5  | 42.5                                              | 32.6                                                     |
| Cys   | 43.2                     | 51.2      | 5.1            | 0.6       | 18.4                              | 14.4               | 3.5        | 36.1    | 20.6             | 13.3      | 5.1      | 24.6  | 32.8                                              | 39.0                                                     |
| Gln   | 44.6                     | 46.1      | 8.5            | 0.8       | 20.1                              | 15.4               | 6.4        | 32.3    | 18.7             | 11.3      | 5.1      | 22.9  | 35.5                                              | 35.1                                                     |
| Glu   | 40.8                     | 50.7      | 8.0            | 0.5       | 19.3                              | 12.4               | 6.4        | 35.8    | 20.1             | 13.4      | 5.4      | 23.1  | 31.7                                              | 38.9                                                     |
| Glh   | 43.2                     | 48.9      | 7.2            | 0.7       | 17.7                              | 16.2               | 5.4        | 33.4    | 20.0             | 10.7      | 6.4      | 23.6  | 33.9                                              | 37.1                                                     |
| Gly   | 31.5                     | 17.1      | 32.0           | 19.4      | 9.2                               | 4.2                | 6.0        | 11.5    | 7.2              | 3.3       | 2.7      | 67.4  | 13.4                                              | 13.2                                                     |
| Hid   | 42.4                     | 47.2      | 9.4            | 1.0       | 17.4                              | 16.4               | 6.9        | 33.0    | 20.0             | 10.2      | 6.0      | 23.2  | 33.8                                              | 36.2                                                     |
| Hie   | 47.4                     | 47.7      | 4.2            | 0.8       | 22.4                              | 13.5               | 3.0        | 36.1    | 19.2             | 15.4      | 3.3      | 23.3  | 35.9                                              | 37.9                                                     |
| Hip   | 47.2                     | 46.6      | 5.6            | 0.5       | 14.5                              | 23.0               | 3.7        | 28.4    | 19.4             | 4.9       | 9.6      | 24.8  | 37.5                                              | 33.9                                                     |
| Ile   | 39.2                     | 59.7      | 1.0            | 0.1       | 17.3                              | 13.2               | 0.8        | 45.0    | 21.9             | 21.9      | 2.9      | 22.0  | 30.5                                              | 46.7                                                     |
| Leu   | 52.2                     | 39.9      | 6.8            | 1.1       | 26.0                              | 16.7               | 5.1        | 29.9    | 16.7             | 11.3      | 3.8      | 20.3  | 42.7                                              | 31.8                                                     |
| Lys   | 47.1                     | 45.5      | 6.6            | 0.9       | 21.4                              | 16.0               | 5.0        | 32.2    | 18.6             | 11.3      | 4.9      | 22.7  | 37.4                                              | 34.8                                                     |
| Met   | 47.6                     | 44.4      | 6.7            | 1.3       | 22.0                              | 16.0               | 5.1        | 31.3    | 17.9             | 11.4      | 4.7      | 22.9  | 38.0                                              | 34.0                                                     |
| Phe   | 45.0                     | 49.0      | 5.5            | 0.5       | 19.9                              | 16.5               | 4.1        | 36.5    | 21.3             | 12.8      | 5.0      | 20.5  | 36.4                                              | 39.1                                                     |
| Pro   | 23.5                     | 76.5      | <0.1           | -         | 19.1                              | «0.1               | -          | 67.1    | 18.7             | 48.5      | «0.1     | 13.7  | 19.1                                              | 67.2                                                     |
| Ser   | 43.9                     | 51.2      | 4.2            | 0.8       | 21.8                              | 10.0               | 3.2        | 37.0    | 17.9             | 17.5      | 3.8      | 25.7  | 31.8                                              | 39.2                                                     |
| Thr   | 48.6                     | 50.2      | 1.1            | 0.1       | 28.1                              | 11.1               | 0.9        | 37.3    | 17.6             | 18.8      | 2.4      | 21.2  | 39.2                                              | 38.8                                                     |
| Trp   | 44.4                     | 47.9      | 6.9            | 0.8       | 20.2                              | 15.2               | 5.3        | 35.3    | 20.0             | 13.4      | 4.1      | 21.9  | 35.4                                              | 37.5                                                     |
| Tyr   | 48.7                     | 43.2      | 7.1            | 1.0       | 22.3                              | 17.8               | 5.4        | 30.9    | 18.0             | 10.7      | 4.5      | 21.2  | 40.1                                              | 33.2                                                     |
| Val   | 33.9                     | 63.1      | 3.0            | <0.1      | 15.4                              | 11.2               | 2.5        | 49.9    | 24.8             | 23.5      | 3.5      | 19.1  | 26.6                                              | 51.8                                                     |

**Table S6. Similarity correlation matrices for the sampling of  $\phi/\psi$  space by the AAXAA guest residues in water at 298 K. Correlations below 0.5 are shaded grey, correlations below 0.7 are emphasized in bold italic.**

| Water 298 K |      |      |      |      |      |      |      |             |             |             |             |             |             |             |             |             |              |             |             |             |             |             |     |
|-------------|------|------|------|------|------|------|------|-------------|-------------|-------------|-------------|-------------|-------------|-------------|-------------|-------------|--------------|-------------|-------------|-------------|-------------|-------------|-----|
| ARG         | ASH  | ASN  | ASP  | CYS  | GLH  | GLN  | GLU  | GLY         | HID         | HIE         | HIP         | ILE         | LEU         | LYS         | MET         | PHE         | PRO          | SER         | THR         | TRP         | TYR         | VAL         |     |
| 0.95        | 0.87 | 0.88 | 0.80 | 0.96 | 0.96 | 0.96 | 0.96 | <b>0.38</b> | 0.92        | 0.96        | 0.73        | 0.73        | 0.92        | 0.95        | 0.95        | 0.93        | <b>0.30</b>  | 0.81        | 0.84        | 0.93        | 0.93        | 0.79        | ALA |
|             | 0.91 | 0.92 | 0.83 | 0.98 | 0.98 | 0.96 | 0.98 | <b>0.35</b> | 0.98        | 0.99        | <b>0.67</b> | 0.73        | 0.97        | 0.99        | 0.97        | 0.97        | <b>0.19</b>  | 0.78        | 0.87        | 0.98        | 0.96        | 0.81        | ARG |
|             |      | 0.99 | 0.78 | 0.85 | 0.89 | 0.86 | 0.91 | <b>0.33</b> | 0.93        | 0.93        | <b>0.59</b> | <b>0.48</b> | 0.94        | 0.92        | 0.89        | 0.94        | <b>0.08</b>  | <b>0.63</b> | 0.82        | 0.94        | 0.91        | <b>0.58</b> | ASH |
|             |      |      | 0.76 | 0.87 | 0.89 | 0.87 | 0.93 | <b>0.33</b> | 0.94        | 0.95        | <b>0.57</b> | <b>0.52</b> | 0.93        | 0.93        | 0.89        | 0.93        | <b>0.13</b>  | <b>0.67</b> | 0.85        | 0.94        | 0.90        | <b>0.63</b> | ASN |
|             |      |      |      | 0.83 | 0.83 | 0.79 | 0.78 | <b>0.20</b> | 0.86        | 0.81        | <b>0.68</b> | <b>0.52</b> | 0.80        | 0.81        | 0.80        | 0.84        | <b>-0.02</b> | <b>0.54</b> | <b>0.69</b> | 0.88        | 0.84        | <b>0.59</b> | ASP |
|             |      |      |      |      | 0.97 | 0.95 | 0.96 | <b>0.31</b> | 0.94        | 0.97        | <b>0.68</b> | 0.80        | 0.92        | 0.97        | 0.94        | 0.93        | <b>0.29</b>  | 0.84        | 0.88        | 0.94        | 0.93        | 0.86        | CYS |
|             |      |      |      |      |      | 0.99 | 0.98 | <b>0.37</b> | 0.96        | 0.97        | 0.77        | 0.70        | 0.96        | 0.99        | 0.98        | 0.98        | <b>0.18</b>  | 0.74        | 0.81        | 0.97        | 0.98        | 0.77        | GLH |
|             |      |      |      |      |      |      | 0.97 | <b>0.40</b> | 0.92        | 0.95        | 0.75        | <b>0.69</b> | 0.96        | 0.97        | 0.99        | 0.97        | <b>0.20</b>  | 0.75        | 0.80        | 0.94        | 0.97        | 0.75        | GLN |
|             |      |      |      |      |      |      |      | <b>0.40</b> | 0.95        | 0.98        | <b>0.67</b> | <b>0.69</b> | 0.96        | 0.99        | 0.97        | 0.96        | <b>0.22</b>  | 0.77        | 0.87        | 0.95        | 0.95        | 0.76        | GLU |
|             |      |      |      |      |      |      |      |             | <b>0.31</b> | <b>0.37</b> | <b>0.38</b> | <b>0.18</b> | <b>0.41</b> | <b>0.37</b> | <b>0.40</b> | <b>0.36</b> | <b>0.06</b>  | <b>0.30</b> | <b>0.30</b> | <b>0.33</b> | <b>0.37</b> | <b>0.18</b> | GLY |
|             |      |      |      |      |      |      |      |             |             | 0.96        | <b>0.69</b> | <b>0.64</b> | 0.95        | 0.97        | 0.94        | 0.97        | <b>0.10</b>  | <b>0.68</b> | 0.81        | 0.99        | 0.96        | 0.73        | HID |
|             |      |      |      |      |      |      |      |             |             |             | <b>0.64</b> | 0.72        | 0.97        | 0.99        | 0.96        | 0.96        | <b>0.25</b>  | 0.81        | 0.91        | 0.97        | 0.94        | 0.80        | HIE |
|             |      |      |      |      |      |      |      |             |             |             |             | <b>0.40</b> | <b>0.65</b> | <b>0.67</b> | 0.74        | 0.75        | <b>-0.01</b> | <b>0.34</b> | <b>0.36</b> | 0.71        | 0.79        | <b>0.43</b> | HIP |
|             |      |      |      |      |      |      |      |             |             |             |             |             | <b>0.61</b> | 0.70        | <b>0.64</b> | <b>0.60</b> | <b>0.49</b>  | 0.86        | 0.75        | <b>0.62</b> | <b>0.59</b> | 0.98        | ILE |
|             |      |      |      |      |      |      |      |             |             |             |             |             |             | 0.98        | 0.98        | 0.98        | <b>0.12</b>  | 0.71        | 0.83        | 0.97        | 0.97        | <b>0.68</b> | LEU |
|             |      |      |      |      |      |      |      |             |             |             |             |             |             |             | 0.98        | 0.98        | <b>0.19</b>  | 0.77        | 0.86        | 0.98        | 0.96        | 0.78        | LYS |
|             |      |      |      |      |      |      |      |             |             |             |             |             |             |             |             | 0.98        | <b>0.15</b>  | 0.71        | 0.79        | 0.96        | 0.98        | 0.70        | MET |
|             |      |      |      |      |      |      |      |             |             |             |             |             |             |             |             |             | <b>0.09</b>  | <b>0.66</b> | 0.78        | 0.99        | 0.99        | <b>0.67</b> | PHE |
|             |      |      |      |      |      |      |      |             |             |             |             |             |             |             |             |             |              | <b>0.61</b> | <b>0.42</b> | <b>0.09</b> | <b>0.07</b> | <b>0.48</b> | PRO |
|             |      |      |      |      |      |      |      |             |             |             |             |             |             |             |             |             |              |             | 0.90        | <b>0.67</b> | <b>0.63</b> | 0.88        | SER |
|             |      |      |      |      |      |      |      |             |             |             |             |             |             |             |             |             |              |             |             | 0.80        | 0.74        | 0.82        | THR |
|             |      |      |      |      |      |      |      |             |             |             |             |             |             |             |             |             |              |             |             |             | 0.98        | 0.71        | TRP |
|             |      |      |      |      |      |      |      |             |             |             |             |             |             |             |             |             |              |             |             |             |             | <b>0.66</b> | TYR |

Water 298 K

**Table S7. Similarity correlation matrices for the sampling of  $\phi/\psi$  space by the AAXAA guest residues in water at 498 K. Correlations below 0.5 are shaded grey, correlations below 0.7 are emphasized in bold italic.**

| Water 498 K |      |      |      |      |      |      |      |                    |                    |                    |                    |                    |                    |                    |                    |                    |                    |                    |                    |                    |                    |                    |     |
|-------------|------|------|------|------|------|------|------|--------------------|--------------------|--------------------|--------------------|--------------------|--------------------|--------------------|--------------------|--------------------|--------------------|--------------------|--------------------|--------------------|--------------------|--------------------|-----|
| ARG         | ASH  | ASN  | ASP  | CYS  | GLH  | GLN  | GLU  | GLY                | HID                | HIE                | HIP                | ILE                | LEU                | LYS                | MET                | PHE                | PRO                | SER                | THR                | TRP                | TYR                | VAL                |     |
| 0.92        | 0.88 | 0.92 | 0.82 | 0.93 | 0.93 | 0.92 | 0.92 | <b><i>0.39</i></b> | 0.93               | 0.90               | 0.87               | 0.81               | 0.88               | 0.91               | 0.91               | 0.92               | <b><i>0.33</i></b> | 0.87               | 0.83               | 0.92               | 0.91               | 0.81               | ALA |
|             | 0.90 | 0.95 | 0.83 | 0.96 | 0.97 | 0.97 | 0.96 | <b><i>0.36</i></b> | 0.96               | 0.94               | 0.88               | 0.87               | 0.95               | 0.97               | 0.97               | 0.97               | <b><i>0.32</i></b> | 0.90               | 0.90               | 0.97               | 0.97               | 0.87               | ARG |
|             |      | 0.95 | 0.86 | 0.87 | 0.90 | 0.91 | 0.88 | <b><i>0.39</i></b> | 0.92               | 0.85               | 0.88               | <b><i>0.68</i></b> | 0.93               | 0.92               | 0.92               | 0.92               | <b><i>0.25</i></b> | 0.79               | 0.80               | 0.90               | 0.93               | <b><i>0.68</i></b> | ASH |
|             |      |      | 0.80 | 0.93 | 0.94 | 0.95 | 0.94 | <b><i>0.38</i></b> | 0.95               | 0.92               | 0.86               | 0.80               | 0.95               | 0.95               | 0.95               | 0.96               | <b><i>0.36</i></b> | 0.87               | 0.88               | 0.95               | 0.96               | 0.81               | ASN |
|             |      |      |      | 0.82 | 0.84 | 0.84 | 0.79 | <b><i>0.35</i></b> | 0.86               | 0.78               | 0.87               | <b><i>0.66</i></b> | 0.81               | 0.84               | 0.84               | 0.82               | <b><i>0.10</i></b> | 0.72               | 0.72               | 0.82               | 0.87               | <b><i>0.61</i></b> | ASP |
|             |      |      |      |      | 0.96 | 0.95 | 0.95 | <b><i>0.34</i></b> | 0.95               | 0.96               | 0.86               | 0.91               | 0.92               | 0.95               | 0.95               | 0.96               | <b><i>0.37</i></b> | 0.93               | 0.92               | 0.97               | 0.95               | 0.90               | CYS |
|             |      |      |      |      |      | 0.97 | 0.95 | <b><i>0.37</i></b> | 0.97               | 0.92               | 0.91               | 0.85               | 0.94               | 0.97               | 0.96               | 0.96               | <b><i>0.29</i></b> | 0.88               | 0.87               | 0.96               | 0.96               | 0.85               | GLH |
|             |      |      |      |      |      |      | 0.96 | <b><i>0.39</i></b> | 0.97               | 0.94               | 0.88               | 0.85               | 0.96               | 0.97               | 0.97               | 0.97               | <b><i>0.32</i></b> | 0.90               | 0.90               | 0.97               | 0.97               | 0.85               | GLN |
|             |      |      |      |      |      |      |      | <b><i>0.38</i></b> | 0.95               | 0.94               | 0.82               | 0.87               | 0.94               | 0.96               | 0.95               | 0.96               | <b><i>0.43</i></b> | 0.93               | 0.92               | 0.96               | 0.94               | 0.88               | GLU |
|             |      |      |      |      |      |      |      |                    | <b><i>0.37</i></b> | <b><i>0.37</i></b> | <b><i>0.30</i></b> | <b><i>0.24</i></b> | <b><i>0.41</i></b> | <b><i>0.39</i></b> | <b><i>0.40</i></b> | <b><i>0.36</i></b> | <b><i>0.11</i></b> | <b><i>0.35</i></b> | <b><i>0.35</i></b> | <b><i>0.37</i></b> | <b><i>0.38</i></b> | <b><i>0.23</i></b> | GLY |
|             |      |      |      |      |      |      |      |                    |                    | 0.92               | 0.91               | 0.84               | 0.94               | 0.96               | 0.96               | 0.96               | <b><i>0.28</i></b> | 0.87               | 0.85               | 0.96               | 0.96               | 0.83               | HID |
|             |      |      |      |      |      |      |      |                    |                    |                    | 0.79               | 0.91               | 0.93               | 0.94               | 0.95               | 0.95               | <b><i>0.45</i></b> | 0.96               | 0.96               | 0.96               | 0.94               | 0.90               | HIE |
|             |      |      |      |      |      |      |      |                    |                    |                    |                    | 0.71               | 0.83               | 0.87               | 0.87               | 0.87               | <b><i>0.10</i></b> | 0.71               | <b><i>0.69</i></b> | 0.85               | 0.88               | <b><i>0.68</i></b> | HIP |
|             |      |      |      |      |      |      |      |                    |                    |                    |                    |                    | 0.81               | 0.85               | 0.85               | 0.87               | <b><i>0.44</i></b> | 0.91               | 0.90               | 0.89               | 0.84               | 0.96               | ILE |
|             |      |      |      |      |      |      |      |                    |                    |                    |                    |                    |                    | 0.97               | 0.97               | 0.96               | <b><i>0.31</i></b> | 0.88               | 0.90               | 0.95               | 0.97               | 0.80               | LEU |
|             |      |      |      |      |      |      |      |                    |                    |                    |                    |                    |                    |                    | 0.98               | 0.97               | <b><i>0.31</i></b> | 0.90               | 0.90               | 0.97               | 0.97               | 0.84               | LYS |
|             |      |      |      |      |      |      |      |                    |                    |                    |                    |                    |                    |                    |                    | 0.97               | <b><i>0.31</i></b> | 0.90               | 0.90               | 0.97               | 0.97               | 0.84               | MET |
|             |      |      |      |      |      |      |      |                    |                    |                    |                    |                    |                    |                    |                    |                    | <b><i>0.35</i></b> | 0.90               | 0.91               | 0.97               | 0.97               | 0.87               | PHE |
|             |      |      |      |      |      |      |      |                    |                    |                    |                    |                    |                    |                    |                    |                    |                    | <b><i>0.55</i></b> | <b><i>0.51</i></b> | <b><i>0.38</i></b> | <b><i>0.30</i></b> | <b><i>0.51</i></b> | PRO |
|             |      |      |      |      |      |      |      |                    |                    |                    |                    |                    |                    |                    |                    |                    |                    |                    | 0.96               | 0.93               | 0.89               | 0.91               | SER |
|             |      |      |      |      |      |      |      |                    |                    |                    |                    |                    |                    |                    |                    |                    |                    |                    |                    | 0.92               | 0.90               | 0.89               | THR |
|             |      |      |      |      |      |      |      |                    |                    |                    |                    |                    |                    |                    |                    |                    |                    |                    |                    |                    | 0.97               | 0.88               | TRP |
|             |      |      |      |      |      |      |      |                    |                    |                    |                    |                    |                    |                    |                    |                    |                    |                    |                    |                    |                    | 0.83               | TYR |

**Table S8. Similarity correlation matrices for the sampling of  $\phi/\psi$  space by the AAXAA guest residues in 8M urea at 298 K.**

| 8M Urea 298 K |      |      |      |      |      |      |      |             |             |             |             |             |             |             |             |             |              |             |             |             |             |             |     |
|---------------|------|------|------|------|------|------|------|-------------|-------------|-------------|-------------|-------------|-------------|-------------|-------------|-------------|--------------|-------------|-------------|-------------|-------------|-------------|-----|
| ARG           | ASH  | ASN  | ASP  | CYS  | GLH  | GLN  | GLU  | GLY         | HID         | HIE         | HIP         | ILE         | LEU         | LYS         | MET         | PHE         | PRO          | SER         | THR         | TRP         | TYR         | VAL         |     |
| 0.94          | 0.86 | 0.88 | 0.76 | 0.96 | 0.93 | 0.92 | 0.93 | <b>0.25</b> | 0.86        | 0.96        | 0.76        | <b>0.67</b> | 0.91        | 0.94        | 0.91        | 0.91        | <b>0.34</b>  | 0.83        | 0.78        | 0.87        | 0.85        | 0.89        | ALA |
|               | 0.90 | 0.90 | 0.81 | 0.94 | 0.97 | 0.99 | 0.97 | <b>0.24</b> | 0.95        | 0.99        | 0.77        | <b>0.58</b> | 0.98        | 0.99        | 0.99        | 0.98        | <b>0.19</b>  | 0.80        | 0.85        | 0.95        | 0.95        | 0.92        | ARG |
|               |      | 0.97 | 0.78 | 0.78 | 0.86 | 0.91 | 0.87 | <b>0.22</b> | 0.92        | 0.89        | 0.74        | <b>0.29</b> | 0.90        | 0.89        | 0.90        | 0.94        | <b>0.08</b>  | <b>0.67</b> | 0.85        | 0.91        | 0.92        | 0.73        | ASH |
|               |      |      | 0.73 | 0.81 | 0.86 | 0.91 | 0.90 | <b>0.21</b> | 0.88        | 0.92        | 0.71        | <b>0.37</b> | 0.90        | 0.90        | 0.90        | 0.93        | <b>0.21</b>  | 0.71        | 0.82        | 0.86        | 0.88        | 0.76        | ASN |
|               |      |      |      | 0.74 | 0.76 | 0.80 | 0.72 | <b>0.10</b> | 0.88        | 0.82        | 0.84        | <b>0.33</b> | 0.74        | 0.78        | 0.81        | 0.86        | <b>-0.02</b> | <b>0.54</b> | 0.72        | 0.88        | 0.89        | 0.75        | ASP |
|               |      |      |      |      | 0.93 | 0.91 | 0.94 | <b>0.22</b> | 0.83        | 0.95        | <b>0.69</b> | 0.78        | 0.91        | 0.95        | 0.92        | 0.89        | <b>0.30</b>  | 0.85        | 0.77        | 0.83        | 0.83        | 0.95        | CYS |
|               |      |      |      |      |      | 0.97 | 0.93 | <b>0.32</b> | 0.90        | 0.95        | 0.80        | <b>0.60</b> | 0.95        | 0.97        | 0.95        | 0.93        | <b>0.18</b>  | 0.78        | 0.78        | 0.94        | 0.89        | 0.88        | GLH |
|               |      |      |      |      |      |      | 0.96 | <b>0.28</b> | 0.96        | 0.97        | 0.77        | <b>0.54</b> | 0.99        | 0.99        | 0.99        | 0.97        | <b>0.18</b>  | 0.79        | 0.87        | 0.96        | 0.95        | 0.89        | GLN |
|               |      |      |      |      |      |      |      | <b>0.28</b> | 0.89        | 0.96        | <b>0.66</b> | <b>0.65</b> | 0.97        | 0.98        | 0.96        | 0.92        | <b>0.29</b>  | 0.87        | 0.90        | 0.86        | 0.88        | 0.91        | GLU |
|               |      |      |      |      |      |      |      |             | <b>0.21</b> | <b>0.23</b> | <b>0.25</b> | <b>0.14</b> | <b>0.28</b> | <b>0.26</b> | <b>0.24</b> | <b>0.20</b> | <b>0.09</b>  | <b>0.30</b> | <b>0.25</b> | <b>0.25</b> | <b>0.19</b> | <b>0.18</b> | GLY |
|               |      |      |      |      |      |      |      |             |             | 0.93        | 0.84        | <b>0.38</b> | 0.92        | 0.93        | 0.96        | 0.98        | <b>0.03</b>  | <b>0.66</b> | 0.82        | 0.97        | 0.99        | 0.83        | HID |
|               |      |      |      |      |      |      |      |             |             |             | 0.77        | <b>0.61</b> | 0.96        | 0.98        | 0.97        | 0.97        | <b>0.24</b>  | 0.80        | 0.84        | 0.92        | 0.93        | 0.92        | HIE |
|               |      |      |      |      |      |      |      |             |             |             |             | <b>0.31</b> | <b>0.68</b> | 0.73        | 0.74        | 0.80        | <b>-0.01</b> | <b>0.44</b> | <b>0.52</b> | 0.87        | 0.81        | <b>0.65</b> | HIP |
|               |      |      |      |      |      |      |      |             |             |             |             |             | <b>0.56</b> | <b>0.61</b> | <b>0.54</b> | <b>0.46</b> | <b>0.49</b>  | 0.75        | <b>0.46</b> | <b>0.40</b> | <b>0.39</b> | 0.80        | ILE |
|               |      |      |      |      |      |      |      |             |             |             |             |             |             | 0.99        | 0.99        | 0.95        | <b>0.19</b>  | 0.82        | 0.89        | 0.92        | 0.92        | 0.89        | LEU |
|               |      |      |      |      |      |      |      |             |             |             |             |             |             |             | 0.99        | 0.96        | <b>0.20</b>  | 0.82        | 0.86        | 0.93        | 0.93        | 0.92        | LYS |
|               |      |      |      |      |      |      |      |             |             |             |             |             |             |             |             | 0.98        | <b>0.15</b>  | 0.78        | 0.87        | 0.94        | 0.96        | 0.91        | MET |
|               |      |      |      |      |      |      |      |             |             |             |             |             |             |             |             |             | <b>0.10</b>  | 0.71        | 0.84        | 0.96        | 0.98        | 0.87        | PHE |
|               |      |      |      |      |      |      |      |             |             |             |             |             |             |             |             |             |              | <b>0.59</b> | <b>0.24</b> | <b>0.03</b> | <b>0.01</b> | <b>0.31</b> | PRO |
|               |      |      |      |      |      |      |      |             |             |             |             |             |             |             |             |             |              |             | 0.84        | <b>0.65</b> | <b>0.65</b> | 0.84        | SER |
|               |      |      |      |      |      |      |      |             |             |             |             |             |             |             |             |             |              |             |             | 0.78        | 0.83        | 0.80        | THR |
|               |      |      |      |      |      |      |      |             |             |             |             |             |             |             |             |             |              |             |             |             | 0.96        | 0.82        | TRP |
|               |      |      |      |      |      |      |      |             |             |             |             |             |             |             |             |             |              |             |             |             |             | 0.84        | TYR |

8M Urea 298 K

**Table S9. Water Residence Times by Conformational Region and Transitions for AAXAA in pure water at 298 K.**

| Residue      | Conformational Region |             |         |           |          |            | Transitions |        |        |
|--------------|-----------------------|-------------|---------|-----------|----------|------------|-------------|--------|--------|
|              | $\alpha_R$            | $n\alpha_R$ | $\beta$ | $P_{IIL}$ | $P_{IR}$ | $\alpha_L$ | other       | N      | N>10ps |
| <b>Ala-1</b> | 75                    | 43          | 37      | 42        | 31       | 213        | 129         | 111887 | 3619   |
| <b>Ala-2</b> | 86                    | 40          | 35      | 47        | 26       | 170        | 104         | 110214 | 3689   |
| <b>Ala-3</b> | 66                    | 28          | 33      | 50        | 22       | 183        | 211         | 113097 | 3501   |
| <b>Arg</b>   | 99                    | 42          | 57      | 51        | 25       | 269        | 131         | 107562 | 3976   |
| <b>Ash</b>   | 217                   | 54          | 57      | 34        | 23       | 160        | 37          | 105056 | 4148   |
| <b>Asn</b>   | 143                   | 43          | 81      | 39        | 26       | 230        | 86          | 111435 | 3729   |
| <b>Asp</b>   | 132                   | 70          | 29      | 11        | 45       | 300        | 38          | 96370  | 4502   |
| <b>Cys</b>   | 106                   | 44          | 52      | 42        | 22       | 218        | 436         | 114198 | 3442   |
| <b>Glh</b>   | 93                    | 42          | 49      | 57        | 23       | 288        | 90          | 29864  | 69     |
| <b>Gln</b>   | 79                    | 46          | 45      | 47        | 16       | 330        | 121         | 106150 | 3901   |
| <b>Glu</b>   | 125                   | 47          | 63      | 75        | 33       | 248        | 610         | 100146 | 4154   |
| <b>Gly</b>   | 70                    | 15          | 17      | 33        | 14       | 25         | 534         | 86520  | 4669   |
| <b>Hie</b>   | 90                    | 40          | 65      | 50        | 21       | 233        | 88          | 108859 | 3887   |
| <b>Hip</b>   | 58                    | 63          | 51      | 53        | 37       | 340        | 260         | 93323  | 5217   |
| <b>Hid</b>   | 118                   | 43          | 71      | 44        | 47       | 183        | 122         | 113031 | 3633   |
| <b>Ile</b>   | 74                    | 62          | 38      | 65        | 23       | 234        | 55          | 108005 | 4313   |
| <b>Leu</b>   | 110                   | 33          | 23      | 41        | 21       | 306        | 201         | 99028  | 4274   |
| <b>Lys</b>   | 101                   | 53          | 56      | 49        | 29       | 252        | 376         | 105275 | 3985   |
| <b>Met</b>   | 67                    | 44          | 66      | 45        | 25       | 283        | 233         | 102725 | 3842   |
| <b>Phe</b>   | 181                   | 51          | 58      | 37        | 22       | 332        | 97          | 104088 | 3913   |
| <b>Pro</b>   | 218                   | 1           | 21      | 76        | 1        | 1          | 11          | 80754  | 6958   |
| <b>Ser</b>   | 85                    | 38          | 28      | 47        | 30       | 370        | 80          | 109253 | 4079   |
| <b>Thr</b>   | 157                   | 44          | 34      | 50        | 17       | 155        | 44          | 102235 | 4754   |
| <b>Trp</b>   | 157                   | 45          | 86      | 41        | 32       | 356        | 137         | 106353 | 3785   |
| <b>Tyr</b>   | 178                   | 48          | 71      | 45        | 27       | 436        | 334         | 102222 | 3838   |
| <b>Val</b>   | 75                    | 51          | 31      | 82        | 25       | 176        | 41          | 114415 | 3986   |

**Table S10. Experimental and Calculated Chemical Shifts used for validating the AAXAA peptide system.**

| Res  | Experimental AAXAA <sup>1</sup><br>(ppm)      |                                    | Experimental GGXGG <sup>2</sup><br>(ppm) |                                  |                                  |                                    | MD Calculated AAXAA<br>(ppm)     |                                    |                                  |                                  |                                  |                                    |
|------|-----------------------------------------------|------------------------------------|------------------------------------------|----------------------------------|----------------------------------|------------------------------------|----------------------------------|------------------------------------|----------------------------------|----------------------------------|----------------------------------|------------------------------------|
|      | <sup>1</sup> H <sub>N</sub>                   | <sup>15</sup> N <sub>H</sub>       | <sup>1</sup> H <sub>α</sub>              | C <sub>α</sub>                   | C <sub>β</sub>                   | C'                                 | <sup>1</sup> H <sub>N</sub>      | <sup>15</sup> N <sub>H</sub>       | <sup>1</sup> H <sub>α</sub>      | C <sub>α</sub>                   | C <sub>β</sub>                   | C'                                 |
| *Ala | 8.29<br>(H <sub>2</sub> O: 8.38) <sup>3</sup> | 123.2<br>(H <sub>2</sub> O: 124.2) | 4.35<br>(H <sub>2</sub> O: 4.29)         | 52.8<br>(H <sub>2</sub> O: 52.3) | 19.3<br>(H <sub>2</sub> O: 19.3) | 178.5<br>(H <sub>2</sub> O: 177.3) | 7.97<br>(H <sub>2</sub> O: 8.01) | 121.7<br>(H <sub>2</sub> O: 122.0) | 4.40<br>(H <sub>2</sub> O: 4.37) | 52.7<br>(H <sub>2</sub> O: 52.8) | 19.6<br>(H <sub>2</sub> O: 19.3) | 177.2<br>(H <sub>2</sub> O: 177.2) |
| Arg  | 8.32                                          | 120.4                              | 4.38                                     | 56.5                             | 30.9                             | 177.1                              | 8.02                             | 119.0                              | 4.39                             | 56.6                             | 31.1                             | 175.9                              |
| Asn  | 8.36                                          | 117.4                              | 4.79                                     | 53.3                             | 39.1                             | 176.1                              | 8.10                             | 116.7                              | 4.74                             | 53.8                             | 39.3                             | 174.8                              |
| Asp  | 8.38                                          | 117.4                              | 4.82                                     | 53.0                             | 38.3                             | 175.9                              | 8.09                             | 119.6                              | 4.64                             | 55.0                             | 41.4                             | 175.9                              |
| Cys  | 8.33                                          | 117.4                              | 4.59                                     | 58.6                             | 28.3                             | 175.3                              | 8.09                             | 116.0                              | 4.66                             | 58.7                             | 28.6                             | 174.2                              |
| Gln  | 8.32                                          | 119.2                              | 4.38                                     | 56.2                             | 29.5                             | 176.8                              | 8.08                             | 118.8                              | 4.39                             | 56.4                             | 29.8                             | 175.7                              |
| Glu  | 8.27                                          | 119.0                              | 4.42                                     | 56.1                             | 29.9                             | 176.8                              | 8.17                             | 119.4                              | 4.38                             | 56.9                             | 30.3                             | 176.2                              |
| *Gly | 8.32                                          | 107.8                              | 4.02                                     | 45.4                             | -                                | 174.9                              | 8.13                             | 107.4                              | 4.00                             | 45.6                             | -                                | 174.2                              |
| Hip  | 8.51                                          | 117.3                              | 4.79                                     | 55.4                             | 29.1                             | 175.1                              | 8.18                             | 117.4                              | 4.70                             | 56.1                             | 30.0                             | 174.2                              |
| Ile  | 8.10                                          | 120.4                              | 4.21                                     | 61.6                             | 38.9                             | 177.1                              | 7.75                             | 116.8                              | 4.28                             | 60.7                             | 39.2                             | 175.9                              |
| Leu  | 8.17                                          | 121.4                              | 4.38                                     | 55.5                             | 42.5                             | 178.2                              | 7.92                             | 120.4                              | 4.40                             | 55.6                             | 42.7                             | 177.1                              |
| Met  | 8.33                                          | 119.4                              | 4.52                                     | 55.8                             | 32.9                             | 177.1                              | 8.04                             | 118.9                              | 4.54                             | 56.1                             | 33.4                             | 175.9                              |
| Phe  | 8.09                                          | 118.8                              | 4.65                                     | 58.1                             | 39.8                             | 176.6                              | 8.04                             | 118.6                              | 4.66                             | 58.4                             | 40.2                             | 175.4                              |
| Pro  | -                                             | -                                  | 4.45                                     | 63.7                             | 32.2                             | 177.8                              | -                                | -                                  | 4.46                             | 63.1                             | 32.2                             | 176.9                              |
| Ser  | 8.27                                          | 114.1                              | 4.51                                     | 58.7                             | 64.1                             | 175.4                              | 8.05                             | 115.0                              | 4.48                             | 58.8                             | 63.9                             | 174.4                              |
| Thr  | 8.06                                          | 112.3                              | 4.43                                     | 62.0                             | 70.0                             | 175.6                              | 8.03                             | 114.0                              | 4.34                             | 62.8                             | 70.0                             | 174.5                              |
| Trp  | 7.95                                          | 119.2                              | 4.70                                     | 57.6                             | 29.8                             | 177.1                              | 7.98                             | 119.8                              | 4.72                             | 58.1                             | 30.2                             | 175.7                              |
| *Tyr | 8.04                                          | 118.9                              | 4.58                                     | 58.3                             | 38.9                             | 176.7                              | 8.04                             | 119.1                              | 4.63                             | 58.8                             | 39.5                             | 175.5                              |
| Val  | 8.10                                          | 119.1                              | 4.16                                     | 62.6                             | 31.8                             | 177.0                              | 7.88                             | 118.0                              | 4.19                             | 62.4                             | 33.1                             | 175.8                              |

<sup>1</sup>Prestegard JH *et al.* (2013) Chemical shift prediction for denatured proteins. *J Biomol NMR* 55(2):201–209 (AAXAA, 8M urea at pH 2.5), <sup>2</sup>Schwarzinger S *et al.* (2000) Random coil chemical shifts in acidic 8 M urea: Implementation of random coil shift data in NMRView. *J Biomol NMR* 18:43-48 (GGXGG, 8M urea at 293 K, pH 2.3), <sup>3</sup>Graf J *et al.* (2007) Structure and dynamics of the homologous series of alanine peptides: a joint molecular dynamics/NMR study. *J Am Chem Soc* 129(5):1179–1189 (AAAAA, H<sub>2</sub>O at 300 K, pH 2).

\*average values calculated over the triplicate simulations for this residue.

**Table S11: Backbone propensity library based on the modal  $\phi/\psi$  angles for the central ‘X’ residue when inhabiting defined regions within a Ramachandran plot.**

| ‘X’         | Modal Dihedral Angles within Conformational Regions (°) |        |                 |        |            |        |            |        |                  |        |                 |        |             |        |
|-------------|---------------------------------------------------------|--------|-----------------|--------|------------|--------|------------|--------|------------------|--------|-----------------|--------|-------------|--------|
|             | $\alpha_R$                                              |        | Near $\alpha_R$ |        | $\alpha_L$ |        | nP $\beta$ |        | P <sub>III</sub> |        | P <sub>IR</sub> |        | Global Mode |        |
|             | $\phi$                                                  | $\psi$ | $\phi$          | $\psi$ | $\phi$     | $\psi$ | $\phi$     | $\psi$ | $\phi$           | $\psi$ | $\phi$          | $\psi$ | $\phi$      | $\psi$ |
| Ala         | -93.1                                                   | -39.7  | -104.8          | -38.1  | 52.6       | 64.6   | -79.4      | -176.0 | -72.0            | 149.9  | -151.6          | 61.4   | -93.1       | -39.7  |
| Arg         | -92.4                                                   | -41.5  | -104.8          | -37.9  | 52.6       | 69.2   | -88.1      | -176.1 | -78.1            | 162.2  | -119.7          | 86.3   | -92.4       | -41.5  |
| Asn         | -83.6                                                   | -44.0  | -104.8          | -40.4  | 52.2       | 71.1   | -76.8      | 115.7  | -68.0            | 125.1  | -119.6          | 95.5   | -83.6       | -44.0  |
| Asp         | -94.9                                                   | -32.6  | -104.6          | -31.5  | 52.4       | 67.9   | -91.3      | 84.9   | -77.7            | 123.5  | -147.2          | 62.7   | -94.9       | -32.6  |
| Ash         | -86.4                                                   | -43.0  | -104.4          | -40.0  | 52.6       | 83.8   | -71.6      | 114.8  | -70.6            | 124.3  | -152.2          | 95.5   | -86.4       | -43.0  |
| Cys         | -95.3                                                   | -37.9  | -104.7          | -35.6  | 52.8       | 67.2   | -73.9      | 115.7  | -74.4            | 156.4  | -131.3          | 66.1   | -97.5       | -37.9  |
| Gln         | -92.3                                                   | -41.0  | -104.7          | -39.9  | 53.1       | 67.7   | -77.2      | 115.6  | -74.6            | 156.7  | -119.7          | 83.2   | -92.3       | -41.0  |
| Glu         | -87.3                                                   | -43.8  | -104.6          | -38.2  | 52.3       | 66.8   | -81.3      | 115.9  | -78.0            | 151.3  | -126.2          | 76.3   | -87.3       | -43.8  |
| Glh         | -95.0                                                   | -41.0  | -111.2          | -37.4  | 54.4       | 68.9   | -79.5      | 115.1  | -77.9            | 157.3  | -125.4          | 78.0   | -95.6       | -41.0  |
| Gly         | -67.7                                                   | -68.6  | -104.0          | -43.9  | 68.2       | 67.2   | -75.2      | -174.9 | -80.7            | 175.8  | -173.1          | 77.6   | 76.4        | 58.2   |
| Hid         | -95.2                                                   | -39.0  | -104.7          | -40.2  | 53.0       | 71.6   | -78.3      | 115.7  | -81.2            | 147.2  | -123.5          | 82.1   | -102.0      | -40.2  |
| Hie         | -87.7                                                   | -41.9  | -104.7          | -38.8  | 54.4       | 68.5   | -73.7      | 115.8  | -73.8            | 157.4  | -119.6          | 92.0   | -104.4      | -58.5  |
| Hip         | -95.7                                                   | -38.5  | -131.8          | -35.3  | 60.3       | 64.0   | -138.1     | 104.5  | -87.9            | 162.5  | -141.3          | 67.8   | 60.3        | 64.0   |
| Ile         | -92.2                                                   | -43.1  | -118.2          | -14.2  | 53.5       | 82.1   | -114.6     | 161.3  | -72.0            | 158.6  | -130.2          | 54.2   | -72.0       | 158.6  |
| Leu         | -92.8                                                   | -41.6  | -104.5          | -39.5  | 53.0       | 68.8   | -85.5      | 116.2  | -74.4            | 153.6  | -119.8          | 94.7   | -92.8       | -41.6  |
| Lys         | -95.0                                                   | -39.2  | -104.7          | -38.3  | 52.1       | 69.4   | -72.8      | 116.0  | -77.7            | 161.4  | -119.7          | 87.5   | -96.4       | -39.2  |
| Met         | -94.4                                                   | -41.6  | -104.7          | -38.6  | 52.3       | 68.5   | -75.3      | 115.6  | -76.6            | 156.6  | -122.6          | 80.2   | -94.4       | -41.6  |
| Phe         | -92.5                                                   | -41.2  | -104.9          | -39.4  | 52.5       | 70.9   | -69.4      | 115.8  | -72.2            | 131.4  | -119.7          | 83.7   | -92.5       | -41.2  |
| Pro         | -60.9                                                   | -55.1  | -               | -      | -          | -      | -64.1      | 116.2  | -63.2            | 149.1  | -               | -      | -63.2       | 149.1  |
| Ser         | -81.9                                                   | -41.6  | -104.3          | -36.0  | 51.7       | 70.2   | -77.9      | -176.1 | -69.7            | 156.7  | -118.6          | 75.8   | -69.7       | 156.7  |
| Thr         | -79.5                                                   | -42.7  | -104.6          | -34.6  | 46.9       | 77.8   | -71.7      | 116.1  | -70.5            | 144.2  | -118.8          | 95.7   | -79.5       | -42.7  |
| Trp         | -95.1                                                   | -39.9  | -104.8          | -38.5  | 53.2       | 71.5   | -75.1      | 115.5  | -72.3            | 142.2  | -119.6          | 85.2   | -100.1      | -38.5  |
| Tyr         | -95.3                                                   | -39.3  | -105.0          | -38.6  | 53.2       | 69.4   | -77.7      | 115.9  | -78.9            | 125.0  | -119.6          | 92.5   | -98.7       | -39.3  |
| Val         | -92.7                                                   | -41.3  | -104.7          | -38.4  | 52.6       | 83.6   | -114.7     | 162.7  | -73.8            | 160.1  | -119.4          | 95.7   | -73.8       | 160.1  |
| Mean        | -89.2                                                   | -42.4  | -104.2          | -35.7  | 51.6       | 68.6   | -82.2      | 127.9  | -74.8            | 149.6  | -126.3          | 78.8   |             |        |
| ( $\pm$ SD) | (8.7)                                                   | (6.5)  | (19.5)          | (9.0)  | (11.0)     | (14.4) | (16.2)     | (27.9) | (4.9)            | (13.8) | (25.1)          | (19.0) |             |        |
